# Supplementary material for: Hot Water Extraction of Antioxidants from Tea Leaves—Optimization of Brewing Conditions for Preparing Antioxidant-Rich Tea Drinks
Source: MDPI journal article supplement (doi:10.3390/molecules28073030), 2023-03-28
Supplement: s1 [file s1]

## Supplementary results

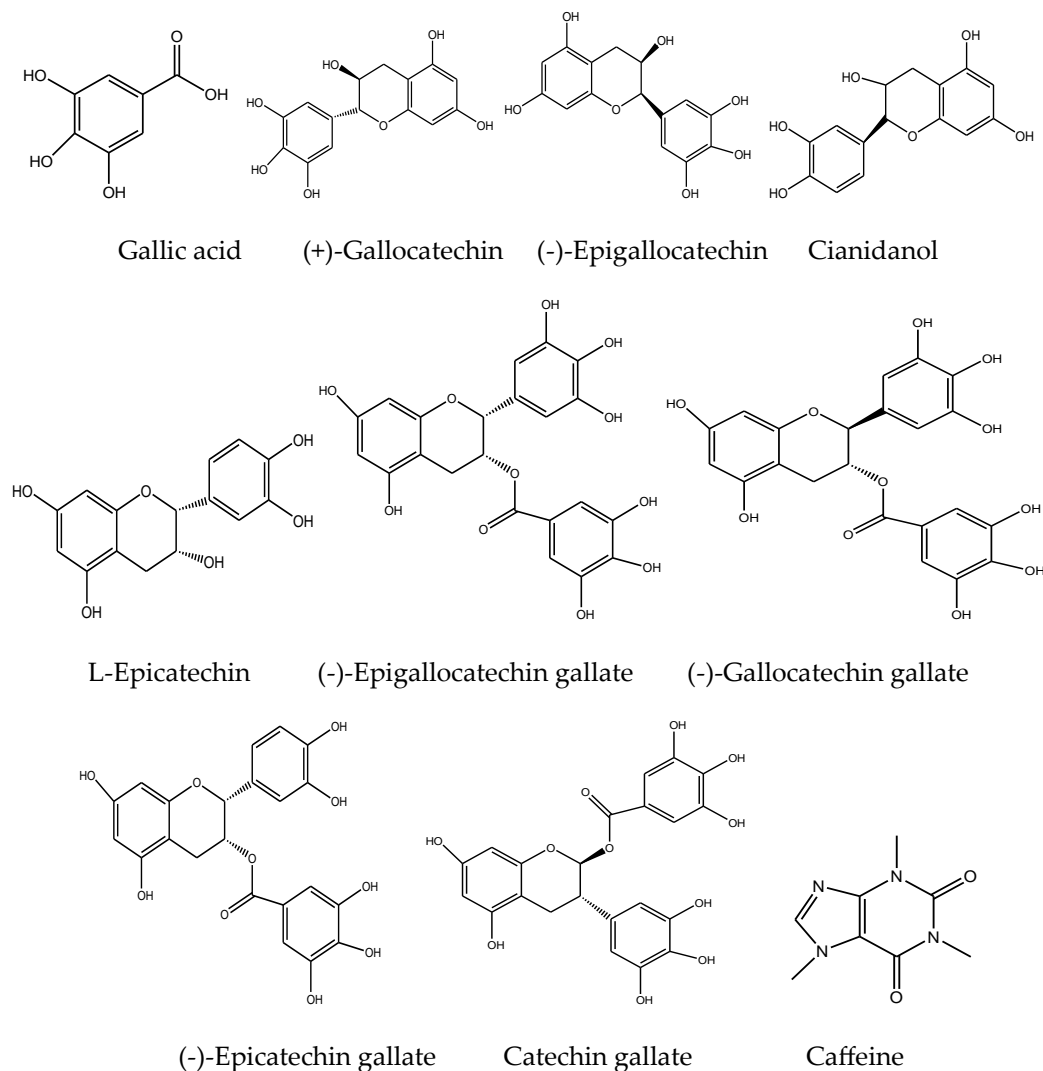

**Figure S1.** Structures of polyphenols and caffeine.

**Table S1.** Kinetic effect on antioxidant concentrations with 20-min brewing time.

| Temp. (°C) | mg/g of Rizhao Tea ** |             |              |             |              |             |              |             |             |             |
|------------|-----------------------|-------------|--------------|-------------|--------------|-------------|--------------|-------------|-------------|-------------|
|            | GA*                   | GC          | EGC          | C           | CAF          | EC          | EGCG         | GCG         | ECG         | CG          |
| 25         | 0.16 ± 0.04**         | 1.22 ± 0.13 | 7.58 ± 0.75  | 0.88 ± 0.13 | 4.97 ± 0.38  | 4.65 ± 0.17 | 3.36 ± 0.53  | 0.41 ± 0.19 | 0.25 ± 0.10 | 0.27 ± 0.09 |
| 50         | 0.32 ± 0.08           | 3.46 ± 0.47 | 11.55 ± 0.12 | 1.01 ± 0.28 | 12.02 ± 0.16 | 4.85 ± 0.12 | 7.37 ± 0.18  | 0.53 ± 0.08 | 1.47 ± 0.35 | 0.30 ± 0.02 |
| 70         | 0.39 ± 0.10           | 4.04 ± 0.26 | 17.13 ± 0.16 | 1.04 ± 0.15 | 17.62 ± 0.15 | 4.91 ± 0.70 | 9.96 ± 0.26  | 0.55 ± 0.01 | 2.09 ± 0.27 | 0.34 ± 0.17 |
| 80         | 0.43 ± 0.08           | 4.22 ± 0.35 | 19.22 ± 0.17 | 1.20 ± 0.09 | 19.69 ± 0.10 | 5.20 ± 0.41 | 12.76 ± 0.15 | 0.61 ± 0.14 | 2.20 ± 0.30 | 0.37 ± 0.07 |
| 90         | 0.45 ± 0.23           | 4.31 ± 0.57 | 22.21 ± 0.37 | 1.49 ± 0.19 | 20.33 ± 0.13 | 6.04 ± 0.80 | 15.97 ± 0.12 | 0.79 ± 0.24 | 2.93 ± 0.44 | 0.41 ± 0.10 |
| 100        | 0.48 ± 0.05           | 4.40 ± 0.55 | 26.88 ± 0.31 | 1.62 ± 0.06 | 20.44 ± 0.15 | 6.53 ± 0.89 | 18.80 ± 0.87 | 0.92 ± 0.17 | 3.42 ± 0.33 | 0.49 ± 0.02 |
|            | mg/g of Longjing Tea  |             |              |             |              |             |              |             |             |             |
| 25         | 0.39 ± 0.19           | 0.49 ± 0.22 | 8.98 ± 0.10  | 0.84 ± 0.17 | 7.40 ± 0.65  | 1.57 ± 0.36 | 9.30 ± 0.25  | 0.19 ± 0.10 | 1.27 ± 0.51 | 0.50 ± 0.05 |
| 50         | 0.61 ± 0.16           | 0.75 ± 0.39 | 15.82 ± 0.39 | 1.47 ± 0.74 | 10.87 ± 0.18 | 2.74 ± 0.73 | 15.04 ± 0.18 | 0.30 ± 0.14 | 2.64 ± 0.29 | 0.61 ± 0.09 |
| 70         | 0.99 ± 0.11           | 0.89 ± 0.78 | 16.46 ± 0.37 | 1.51 ± 0.08 | 14.49 ± 0.21 | 4.71 ± 0.11 | 16.53 ± 0.33 | 0.36 ± 0.09 | 3.05 ± 0.45 | 0.60 ± 0.40 |

|                                |             |             |              |             |              |             |              |             |             |             |
|--------------------------------|-------------|-------------|--------------|-------------|--------------|-------------|--------------|-------------|-------------|-------------|
| 80                             | 1.15 ± 0.15 | 0.95 ± 0.78 | 18.46 ± 0.33 | 1.75 ± 0.28 | 16.18 ± 0.80 | 6.33 ± 0.73 | 18.86 ± 0.11 | 0.39 ± 0.12 | 3.25 ± 0.66 | 0.69 ± 0.37 |
| 90                             | 1.29 ± 0.10 | 1.68 ± 0.67 | 20.93 ± 0.10 | 2.29 ± 0.58 | 16.79 ± 0.16 | 7.96 ± 0.99 | 21.17 ± 0.37 | 0.40 ± 0.09 | 3.86 ± 0.47 | 0.75 ± 0.15 |
| 100                            | 1.49 ± 0.26 | 2.32 ± 0.66 | 26.60 ± 0.20 | 2.83 ± 0.62 | 17.86 ± 0.16 | 8.25 ± 0.28 | 21.75 ± 0.34 | 0.41 ± 0.15 | 3.96 ± 0.12 | 0.77 ± 0.22 |
| mg/g of Tieguanyin Tea         |             |             |              |             |              |             |              |             |             |             |
| 25                             | 0.50 ± 0.35 | 0.76 ± 0.11 | 1.83 ± 0.16  | 0.49 ± 0.10 | 3.32 ± 0.82  | 1.17 ± 0.87 | 2.86 ± 0.40  | 0.09 ± 0.09 | 0.48 ± 0.13 | 0.26 ± 0.23 |
| 50                             | 1.05 ± 0.17 | 1.24 ± 0.73 | 5.35 ± 0.28  | 0.82 ± 0.62 | 5.19 ± 0.40  | 2.08 ± 0.47 | 5.01 ± 0.11  | 0.21 ± 0.15 | 0.88 ± 0.33 | 0.51 ± 0.11 |
| 70                             | 1.33 ± 0.09 | 1.96 ± 0.33 | 13.93 ± 0.19 | 1.13 ± 0.36 | 10.91 ± 0.23 | 2.40 ± 0.09 | 10.09 ± 0.29 | 0.34 ± 0.12 | 1.71 ± 0.47 | 0.74 ± 0.12 |
| 80                             | 1.40 ± 0.21 | 1.99 ± 0.02 | 14.50 ± 0.12 | 1.28 ± 0.05 | 12.96 ± 0.45 | 2.58 ± 0.22 | 11.62 ± 0.19 | 0.39 ± 0.10 | 2.13 ± 0.04 | 0.82 ± 0.04 |
| 90                             | 1.54 ± 0.18 | 3.22 ± 0.66 | 16.58 ± 0.11 | 1.33 ± 0.30 | 15.12 ± 0.13 | 2.63 ± 0.48 | 13.00 ± 0.15 | 0.42 ± 0.07 | 3.01 ± 0.22 | 0.88 ± 0.20 |
| 100                            | 1.57 ± 0.42 | 3.47 ± 0.85 | 16.67 ± 0.35 | 1.41 ± 0.23 | 16.71 ± 0.17 | 2.84 ± 0.86 | 13.98 ± 0.14 | 0.45 ± 0.11 | 3.04 ± 0.25 | 0.90 ± 0.07 |
| mg/g of Dahongpao Tea          |             |             |              |             |              |             |              |             |             |             |
| 25                             | 0.06 ± 0.04 | 0.91 ± 0.16 | 5.49 ± 0.82  | 0.43 ± 0.08 | 1.49 ± 0.18  | 1.07 ± 0.18 | 2.29 ± 0.62  | ND***       | 0.44 ± 0.14 | ND          |
| 50                             | 0.13 ± 0.08 | 1.27 ± 0.58 | 6.32 ± 0.20  | 0.59 ± 0.10 | 3.12 ± 0.36  | 1.41 ± 0.28 | 5.89 ± 0.66  | ND          | 0.85 ± 0.77 | ND          |
| 70                             | 0.16 ± 0.09 | 1.53 ± 0.59 | 14.23 ± 0.12 | 0.63 ± 0.08 | 5.11 ± 0.95  | 2.45 ± 0.19 | 8.52 ± 0.40  | ND          | 1.20 ± 0.44 | ND          |
| 80                             | 0.17 ± 0.04 | 1.65 ± 0.16 | 14.72 ± 0.37 | 0.68 ± 0.03 | 5.58 ± 0.89  | 2.67 ± 0.31 | 9.05 ± 0.85  | 0.08 ± 0.04 | 1.57 ± 0.26 | ND          |
| 90                             | 0.19 ± 0.05 | 1.73 ± 0.55 | 15.58 ± 0.11 | 0.69 ± 0.04 | 5.72 ± 0.97  | 2.80 ± 0.69 | 10.58 ± 0.18 | 0.13 ± 0.01 | 1.65 ± 0.20 | 0.10 ± 0.02 |
| 100                            | 0.19 ± 0.10 | 1.80 ± 0.18 | 18.20 ± 0.24 | 0.70 ± 0.17 | 7.04 ± 0.73  | 2.93 ± 0.07 | 11.16 ± 0.69 | 0.14 ± 0.03 | 1.75 ± 0.12 | 0.14 ± 0.01 |
| mg/g of Pu-erh Tea             |             |             |              |             |              |             |              |             |             |             |
| 25                             | 0.10 ± 0.02 | ND          | ND           | ND          | ND           | ND          | ND           | ND          | ND          | ND          |
| 50                             | 0.25 ± 0.07 | ND          | ND           | ND          | 2.31 ± 0.56  | ND          | ND           | ND          | ND          | ND          |
| 70                             | 0.36 ± 0.23 | ND          | ND           | ND          | 5.04 ± 0.16  | ND          | ND           | ND          | ND          | ND          |
| 80                             | 0.58 ± 0.12 | ND          | ND           | ND          | 5.41 ± 0.17  | ND          | ND           | ND          | ND          | ND          |
| 90                             | 0.74 ± 0.26 | ND          | ND           | ND          | 7.01 ± 0.11  | ND          | ND           | ND          | ND          | ND          |
| 100                            | 0.75 ± 0.19 | ND          | ND           | ND          | 7.19 ± 0.85  | ND          | ND           | ND          | ND          | ND          |
| mg/g of Zhengshanxiaozhong Tea |             |             |              |             |              |             |              |             |             |             |
| 25                             | 0.21 ± 0.02 | ND          | ND           | ND          | ND           | ND          | ND           | ND          | ND          | ND          |
| 50                             | 0.39 ± 0.06 | 0.44 ± 0.24 | 1.87 ± 0.98  | 0.90 ± 0.04 | 4.87 ± 0.40  | 1.15 ± 0.15 | 1.60 ± 0.11  | ND          | ND          | ND          |
| 70                             | 0.45 ± 0.14 | 1.06 ± 0.24 | 3.44 ± 0.28  | 0.97 ± 0.08 | 8.39 ± 0.43  | 2.08 ± 0.30 | 3.32 ± 0.03  | ND          | 0.24 ± 0.06 | ND          |
| 80                             | 0.65 ± 0.14 | 1.68 ± 0.44 | 3.92 ± 0.26  | 1.92 ± 0.17 | 10.30 ± 0.96 | 2.36 ± 0.47 | 4.01 ± 0.34  | ND          | 0.46 ± 0.09 | ND          |
| 90                             | 0.76 ± 0.17 | 3.00 ± 0.04 | 4.43 ± 0.56  | 2.14 ± 0.15 | 11.15 ± 1.01 | 2.70 ± 0.30 | 4.13 ± 0.10  | ND          | 0.49 ± 0.10 | ND          |
| 100                            | 1.55 ± 0.10 | 5.35 ± 0.70 | 4.77 ± 0.67  | 2.75 ± 0.14 | 12.02 ± 1.08 | 4.54 ± 0.05 | 4.32 ± 0.01  | ND          | 0.51 ± 0.08 | ND          |
| mg/g of Jasmine Tea            |             |             |              |             |              |             |              |             |             |             |
| 25                             | 0.08 ± 0.02 | 0.20 ± 0.05 | 0.74 ± 0.18  | ND          | 1.26 ± 0.31  | 0.16 ± 0.05 | 0.15 ± 0.04  | ND          | 0.05 ± 0.01 | ND          |
| 50                             | 0.16 ± 0.13 | 0.35 ± 0.04 | 1.49 ± 0.08  | 0.16 ± 0.01 | 2.65 ± 0.73  | 0.32 ± 0.09 | 0.39 ± 0.07  | ND          | 0.08 ± 0.04 | ND          |
| 70                             | 0.49 ± 0.24 | 0.68 ± 0.05 | 3.41 ± 0.13  | 0.35 ± 0.07 | 6.36 ± 0.24  | 0.50 ± 0.09 | 0.96 ± 0.11  | ND          | 0.21 ± 0.02 | 0.11 ± 0.03 |
| 80                             | 0.53 ± 0.15 | 1.40 ± 0.16 | 5.49 ± 0.09  | 0.59 ± 0.09 | 9.49 ± 1.64  | 1.03 ± 0.07 | 1.57 ± 0.34  | 0.08 ± 0.02 | 0.36 ± 0.02 | 0.25 ± 0.09 |
| 90                             | 0.94 ± 0.27 | 1.60 ± 0.10 | 6.42 ± 0.10  | 0.76 ± 0.07 | 11.94 ± 0.83 | 1.62 ± 0.10 | 1.89 ± 0.21  | 0.15 ± 0.03 | 0.42 ± 0.06 | 0.40 ± 0.08 |
| 100                            | 1.02 ± 0.08 | 1.67 ± 0.25 | 6.81 ± 0.11  | 0.82 ± 0.08 | 12.68 ± 0.32 | 1.81 ± 0.05 | 2.10 ± 0.07  | 0.21 ± 0.07 | 0.44 ± 0.05 | 0.45 ± 0.09 |

\* Gallic acid (GA), (+)-Gallocatechin (GC), (-)-Epigallocatechin (EGC), Cianidanol (C), Caffeine (CAF), L-Epicatechin (EC), (-)-Epigallocatechin gallate (EGCG), (-)-Gallocatechin gallate (GCG), (-)-Epicatechin gallate (ECG), Catechin gallate (CG)

\*\* Mean (± SD), n = 3

\*\*\*ND, not detected, below the detection limit shown in Table 2.

**Table S2.** Kinetic effect on antioxidant concentrations at 100 °C.

| Time (min)                     | mg/g of Rizhao Tea** |             |              |             |              |              |              |             |             |             |
|--------------------------------|----------------------|-------------|--------------|-------------|--------------|--------------|--------------|-------------|-------------|-------------|
|                                | GA*                  | GC          | EGC          | C           | CAF          | EC           | EGCG         | GCG         | ECG         | CG          |
| 5                              | 0.40 ± 0.06**        | 2.40 ± 2.08 | 15.95 ± 2.34 | 0.50 ± 0.05 | 17.57 ± 2.29 | 3.36 ± 0.67  | 6.17 ± 1.59  | 0.24 ± 0.06 | 0.79 ± 0.29 | 0.30 ± 0.04 |
| 10                             | 0.43 ± 0.05          | 3.10 ± 0.55 | 21.88 ± 0.31 | 1.02 ± 0.06 | 18.44 ± 0.15 | 5.63 ± 0.89  | 9.84 ± 0.87  | 0.78 ± 0.17 | 2.60 ± 0.33 | 0.41 ± 0.02 |
| 20                             | 0.48 ± 0.05          | 4.40 ± 0.55 | 26.88 ± 0.31 | 1.62 ± 0.06 | 20.44 ± 0.15 | 6.53 ± 0.89  | 18.80 ± 0.87 | 0.92 ± 0.17 | 3.42 ± 0.33 | 0.49 ± 0.02 |
| 30                             | 0.55 ± 0.06          | 5.47 ± 0.10 | 30.14 ± 0.33 | 2.10 ± 0.05 | 22.12 ± 1.19 | 8.29 ± 0.67  | 23.72 ± 3.12 | 1.06 ± 0.18 | 4.46 ± 0.36 | 0.58 ± 0.12 |
| 60                             | 0.65 ± 0.03          | 6.27 ± 0.12 | 35.12 ± 0.30 | 3.03 ± 0.21 | 22.97 ± 1.05 | 10.88 ± 0.38 | 29.87 ± 2.30 | 1.29 ± 0.15 | 5.80 ± 0.47 | 0.77 ± 0.05 |
| 120                            | 0.75 ± 0.24          | 6.22 ± 0.07 | 40.12 ± 0.28 | 3.56 ± 0.10 | 23.27 ± 0.58 | 11.98 ± 0.39 | 32.25 ± 2.21 | 1.31 ± 0.15 | 6.33 ± 0.37 | 0.85 ± 0.06 |
| 720                            | 0.88 ± 0.39          | 3.63 ± 3.81 | 47.47 ± 0.38 | 3.02 ± 0.14 | 23.91 ± 0.51 | 3.22 ± 0.17  | 3.55 ± 0.32  | 1.01 ± 0.06 | 5.53 ± 0.55 | 0.20 ± 0.02 |
| mg/g of Longjing Tea           |                      |             |              |             |              |              |              |             |             |             |
| 5                              | 0.81 ± 0.21          | 1.25 ± 0.68 | 11.70 ± 1.42 | 1.05 ± 0.10 | 11.25 ± 4.56 | 3.38 ± 1.34  | 6.96 ± 0.37  | ND***       | 0.98 ± 0.79 | 0.34 ± 0.03 |
| 10                             | 1.23 ± 0.03          | 1.89 ± 0.76 | 19.88 ± 1.93 | 2.05 ± 0.12 | 15.16 ± 2.58 | 5.66 ± 0.53  | 10.72 ± 0.50 | 0.09 ± 0.08 | 2.78 ± 0.65 | 0.60 ± 0.02 |
| 20                             | 1.49 ± 0.26          | 2.32 ± 0.66 | 26.60 ± 0.20 | 2.83 ± 0.62 | 17.86 ± 0.16 | 8.25 ± 0.28  | 21.75 ± 0.34 | 0.41 ± 0.15 | 3.96 ± 0.12 | 0.77 ± 0.22 |
| 30                             | 1.67 ± 0.33          | 2.84 ± 1.20 | 31.40 ± 5.58 | 3.89 ± 0.29 | 19.34 ± 3.31 | 10.06 ± 2.13 | 32.61 ± 1.23 | 0.64 ± 0.18 | 5.66 ± 1.16 | 0.92 ± 0.04 |
| 60                             | 1.91 ± 0.17          | 4.33 ± 1.06 | 36.09 ± 3.67 | 5.06 ± 0.29 | 21.39 ± 1.73 | 11.69 ± 0.93 | 37.99 ± 2.02 | 0.73 ± 0.07 | 6.67 ± 0.60 | 1.09 ± 0.04 |
| 120                            | 2.15 ± 0.31          | 1.50 ± 0.54 | 39.71 ± 1.94 | 4.87 ± 0.20 | 21.59 ± 1.45 | 12.10 ± 0.96 | 39.41 ± 1.55 | 0.95 ± 0.06 | 7.06 ± 0.46 | 1.15 ± 0.04 |
| 720                            | 2.25 ± 0.08          | 0.28 ± 1.15 | 44.19 ± 2.62 | 0.49 ± 0.18 | 22.11 ± 0.16 | 1.28 ± 0.11  | 3.79 ± 0.22  | 0.10 ± 0.05 | 0.75 ± 1.46 | 0.07 ± 0.04 |
| mg/g of Tieguanyin Tea         |                      |             |              |             |              |              |              |             |             |             |
| 5                              | 0.81 ± 0.04          | 2.62 ± 0.32 | 14.66 ± 0.75 | 1.15 ± 0.04 | 15.46 ± 1.16 | 2.36 ± 0.01  | 11.86 ± 0.89 | 0.36 ± 0.04 | 2.21 ± 0.11 | 0.75 ± 0.07 |
| 10                             | 1.20 ± 0.07          | 2.93 ± 0.14 | 15.50 ± 0.79 | 1.23 ± 0.05 | 15.81 ± 0.97 | 2.65 ± 0.01  | 12.67 ± 0.83 | 0.38 ± 0.04 | 2.34 ± 0.12 | 0.82 ± 0.07 |
| 20                             | 1.57 ± 0.42          | 3.47 ± 0.85 | 16.67 ± 0.35 | 1.41 ± 0.23 | 16.71 ± 0.17 | 2.84 ± 0.86  | 13.98 ± 0.14 | 0.45 ± 0.11 | 3.04 ± 0.25 | 0.90 ± 0.07 |
| 30                             | 1.86 ± 0.11          | 3.94 ± 1.22 | 17.32 ± 0.73 | 1.54 ± 0.07 | 17.14 ± 0.85 | 3.02 ± 0.01  | 14.47 ± 0.80 | 0.50 ± 0.04 | 3.48 ± 0.15 | 0.95 ± 0.08 |
| 60                             | 2.25 ± 0.45          | 4.02 ± 2.23 | 18.53 ± 1.03 | 1.74 ± 0.20 | 18.30 ± 0.87 | 3.31 ± 0.10  | 15.99 ± 1.00 | 0.65 ± 0.01 | 4.35 ± 0.19 | 1.02 ± 0.12 |
| 120                            | 2.56 ± 0.18          | 3.26 ± 0.51 | 18.56 ± 0.89 | 1.78 ± 0.11 | 20.81 ± 1.57 | 2.43 ± 0.02  | 19.15 ± 1.21 | 0.81 ± 0.13 | 5.00 ± 0.95 | 0.43 ± 0.22 |
| 720                            | 2.69 ± 0             | 0.96 ± 0.05 | 18.93 ± 0.21 | 0           | 21.21 ± 0.04 | 0.71 ± 0.06  | 1.81 ± 0.07  | ND          | 0.19 ± 0.01 | ND          |
| mg/g of Dahongpao Tea          |                      |             |              |             |              |              |              |             |             |             |
| 5                              | 0.06 ± 0.05          | 0.89 ± 0.15 | 8.60 ± 2.10  | 0.33 ± 0.09 | 3.72 ± 0.56  | 1.37 ± 0.13  | 5.69 ± 0.21  | 0.08 ± 0.05 | 0.83 ± 0.24 | 0.04 ± 0    |
| 10                             | 0.11 ± 0.02          | 1.29 ± 0.15 | 12.87 ± 2.19 | 0.46 ± 0.18 | 5.21 ± 0.81  | 2.03 ± 0.21  | 8.56 ± 0.81  | 0.11 ± 0.09 | 1.25 ± 0.25 | 0.09 ± 0.01 |
| 20                             | 0.19 ± 0.10          | 1.80 ± 0.18 | 18.20 ± 0.24 | 0.70 ± 0.17 | 7.04 ± 0.73  | 2.93 ± 0.07  | 11.16 ± 0.69 | 0.14 ± 0.03 | 1.75 ± 0.12 | 0.14 ± 0.01 |
| 30                             | 0.25 ± 0.01          | 2.41 ± 0.13 | 22.98 ± 3.36 | 0.91 ± 0.10 | 8.06 ± 0.59  | 3.86 ± 0.37  | 13.95 ± 0.58 | 0.17 ± 0.01 | 2.21 ± 0.32 | 0.18 ± 0.01 |
| 60                             | 0.34 ± 0.15          | 3.96 ± 0.06 | 31.09 ± 3.29 | 1.21 ± 0.10 | 9.92 ± 0.22  | 5.22 ± 0.19  | 17.72 ± 0.28 | 0.18 ± 0.05 | 2.67 ± 0.18 | 0.24 ± 0.01 |
| 120                            | 0.45 ± 0.02          | 3.23 ± 0.27 | 37.33 ± 5.40 | 1.50 ± 0.17 | 11.79 ± 0.66 | 6.49 ± 0.50  | 21.01 ± 0.47 | 0.21 ± 0.04 | 3.13 ± 0.34 | 0.21 ± 0    |
| 720                            | 0.51 ± 0.06          | 1.27 ± 0.71 | 38.36 ± 4.45 | 1.43 ± 0.11 | 14.88 ± 1.33 | 4.98 ± 0.32  | 3.48 ± 0.18  | 0.19 ± 0.09 | 0.56 ± 0.28 | 0.20 ± 0    |
| mg/g of Pu-erh Tea             |                      |             |              |             |              |              |              |             |             |             |
| 5                              | 0.35 ± 0.08          | ND          | ND           | ND          | 3.21 ± 0.52  | ND           | ND           | ND          | ND          | ND          |
| 10                             | 0.59 ± 0.17          | ND          | ND           | ND          | 5.16 ± 0.20  | ND           | ND           | ND          | ND          | ND          |
| 20                             | 0.75 ± 0.19          | ND          | ND           | ND          | 7.19 ± 0.85  | ND           | ND           | ND          | ND          | ND          |
| 30                             | 0.90 ± 0.16          | ND          | ND           | ND          | 8.93 ± 0.08  | ND           | ND           | ND          | ND          | ND          |
| 60                             | 1.45 ± 0.64          | ND          | 0.25 ± 0.44  | ND          | 13.69 ± 0.43 | ND           | ND           | ND          | ND          | ND          |
| 120                            | 2.83 ± 0.42          | ND          | 0.88 ± 0.06  | ND          | 22.83 ± 0.81 | ND           | ND           | ND          | ND          | ND          |
| 720                            | 3.52 ± 0.15          | ND          | 1.24 ± 1.09  | ND          | 26.02 ± 0.58 | ND           | ND           | ND          | ND          | ND          |
| mg/g of Zhengshanxiaozhong Tea |                      |             |              |             |              |              |              |             |             |             |
| 5                              | 0.60 ± 0.02          | 1.56 ± 0.18 | 1.70 ± 0.29  | 0.35 ± 0.04 | 4.82 ± 0.83  | 1.18 ± 0.04  | 1.83 ± 0.55  | ND          | 0.30 ± 0.03 | ND          |
| 10                             | 1.07 ± 0.35          | 3.05 ± 0.67 | 3.38 ± 0.98  | 1.62 ± 0.13 | 9.02 ± 0.33  | 3.00 ± 0.11  | 3.17 ± 0.39  | ND          | 0.42 ± 0.12 | ND          |
| 20                             | 1.55 ± 0.10          | 5.35 ± 0.70 | 4.77 ± 0.67  | 2.75 ± 0.14 | 12.02 ± 1.08 | 4.54 ± 0.05  | 4.32 ± 0.01  | ND          | 0.51 ± 0.08 | ND          |
| 30                             | 1.92 ± 1.37          | 6.75 ± 0.64 | 5.84 ± 0.47  | 3.89 ± 0.14 | 15.90 ± 0.76 | 8.73 ± 0.19  | 7.13 ± 0.11  | 0.45 ± 0.48 | 0.67 ± 0.31 | 0.12 ± 0.01 |
| 60                             | 2.21 ± 0.23          | 7.72 ± 0.39 | 6.34 ± 0.26  | 5.10 ± 0.05 | 16.20 ± 0.28 | 14.11 ± 0.45 | 9.37 ± 0.39  | 0.72 ± 0.13 | 1.12 ± 0.16 | 0.21 ± 0.02 |
| 120                            | 2.60 ± 0.48          | 6.24 ± 0.16 | 6.57 ± 0.25  | 5.61 ± 0.06 | 23.71 ± 0.20 | 15.49 ± 0.56 | 16.54 ± 0.23 | 1.08 ± 0.08 | 1.25 ± 0.09 | 0.24 ± 0    |
| 720                            | 4.47 ± 0.30          | 3.33 ± 0.24 | 7.02 ± 0.11  | 0.38 ± 0.01 | 24.65 ± 0.29 | 2.79 ± 0.14  | 3.73 ± 0.05  | 0.17 ± 0.29 | 0.40 ± 0.01 | 0.09 ± 0.02 |
| mg/g of Jasmine Tea            |                      |             |              |             |              |              |              |             |             |             |
| 5                              | 0.87 ± 0.07          | 1.09 ± 0.21 | 3.45 ± 0.35  | 0.58 ± 0.05 | 3.70 ± 0.07  | 1.24 ± 0.17  | 1.53 ± 0.12  | 0.15 ± 0.03 | 0.20 ± 0.02 | 0.27 ± 0.04 |
| 10                             | 0.91 ± 0.15          | 1.38 ± 0.39 | 5.01 ± 1.08  | 0.66 ± 0.04 | 8.90 ± 0.06  | 1.56 ± 0.29  | 1.78 ± 0.14  | 0.19 ± 0.03 | 0.35 ± 0.05 | 0.32 ± 0.02 |
| 20                             | 1.02 ± 0.08          | 1.67 ± 0.25 | 6.81 ± 0.11  | 0.82 ± 0.08 | 12.68 ± 0.32 | 1.81 ± 0.05  | 2.10 ± 0.07  | 0.21 ± 0.07 | 0.44 ± 0.05 | 0.45 ± 0.09 |

|     |             |             |              |             |              |             |             |             |             |             |
|-----|-------------|-------------|--------------|-------------|--------------|-------------|-------------|-------------|-------------|-------------|
| 30  | 1.11 ± 0.39 | 1.96 ± 0.14 | 8.32 ± 1.05  | 1.02 ± 0.06 | 15.99 ± 0.84 | 2.15 ± 0.09 | 2.36 ± 0.07 | 0.25 ± 0.09 | 0.59 ± 0.05 | 0.61 ± 0.03 |
| 60  | 1.34 ± 0.23 | 2.87 ± 0.43 | 9.03 ± 1.23  | 1.57 ± 0.05 | 17.63 ± 0.32 | 2.51 ± 0.10 | 2.49 ± 0.12 | 0.30 ± 0.07 | 0.37 ± 0.03 | 0.79 ± 0.01 |
| 120 | 1.55 ± 0.21 | 1.81 ± 0.29 | 11.33 ± 1.43 | 1.53 ± 0.17 | 18.91 ± 0.22 | 2.94 ± 0.06 | 3.26 ± 0.02 | 0.25 ± 0.09 | 0.30 ± 0.01 | 0.86 ± 0.02 |
| 720 | 1.77 ± 0.35 | 1.01 ± 0.12 | 12.90 ± 2.22 | 0.93 ± 0.09 | 23.94 ± 0.71 | 1.70 ± 0.29 | 0.36 ± 0.07 | 0.13 ± 0.05 | 0.10 ± 0.02 | 0.22 ± 0    |

\* Gallic acid (GA), (+)-Gallocatechin (GC), (-)-Epigallocatechin (EGC), Cianidanol (C), Caffeine (CAF), L-Epicatechin (EC), (-)-Epigallocatechin gallate (EGCG), (-)-Gallocatechin gallate (GCG), (-)-Epicatechin gallate (ECG), Catechin gallate (CG)

\*\* Mean (± SD), n = 3

\*\*\*ND, not detected, below the detection limit shown in Table 2.
